# Supplementary material
Source: MDPI journal article supplement (https://www.mdpi.com/2073-4441/14/22/3731)
Supplement: s1 [file s1]

## Supplementary Materials

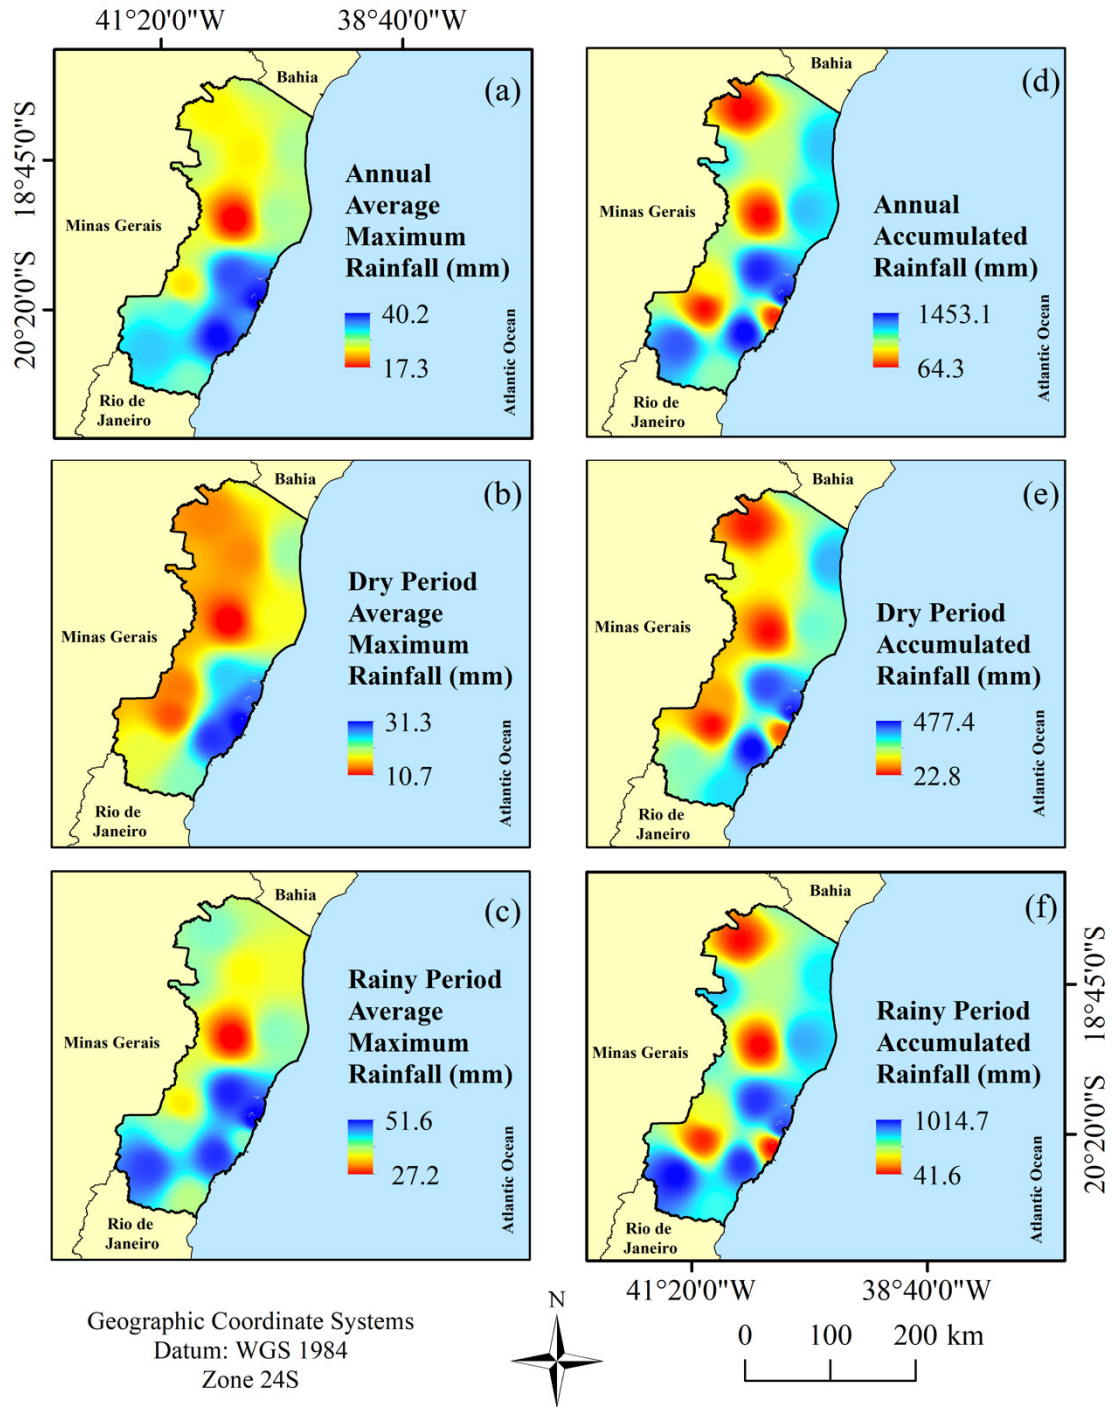

Figure S1. Rainfall distribution for Espírito Santo state, Brazil. (a) Annual average maximum rainfall, (b) dry period average maximum rainfall, (c) rainy period average maximum rainfall, (d) annual accumulated rainfall, (e) dry period accumulated rainfall e (f) rainy period accumulated rainfall.

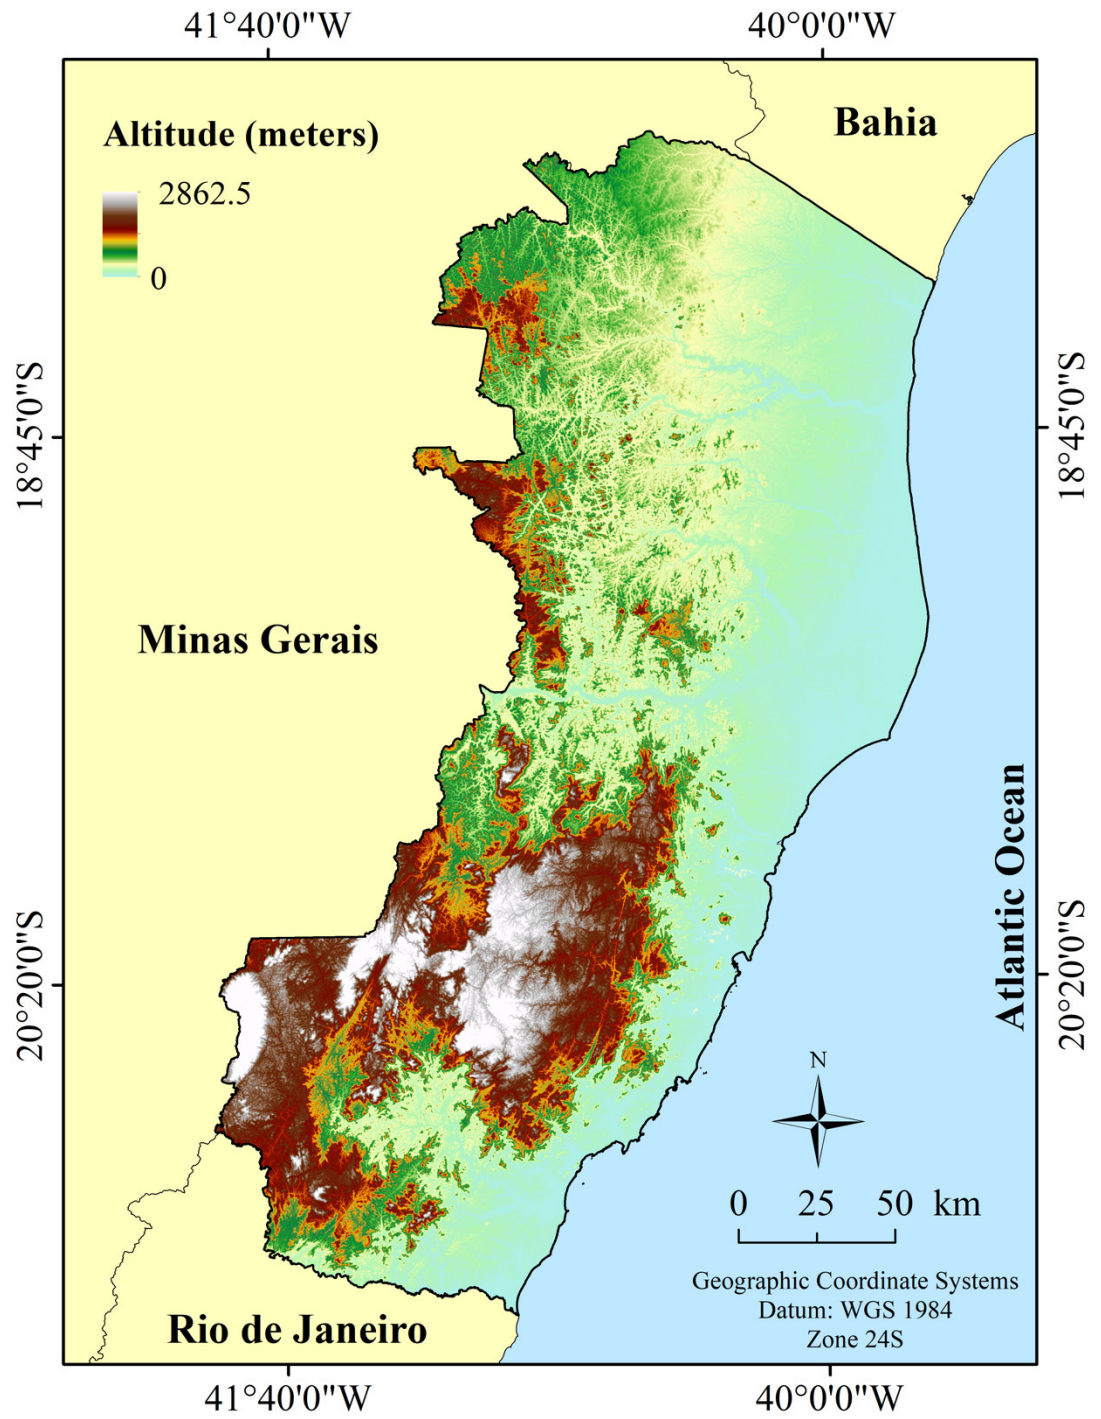

Figure S2. Digital Elevation Model for Espírito Santo state, Brazil.

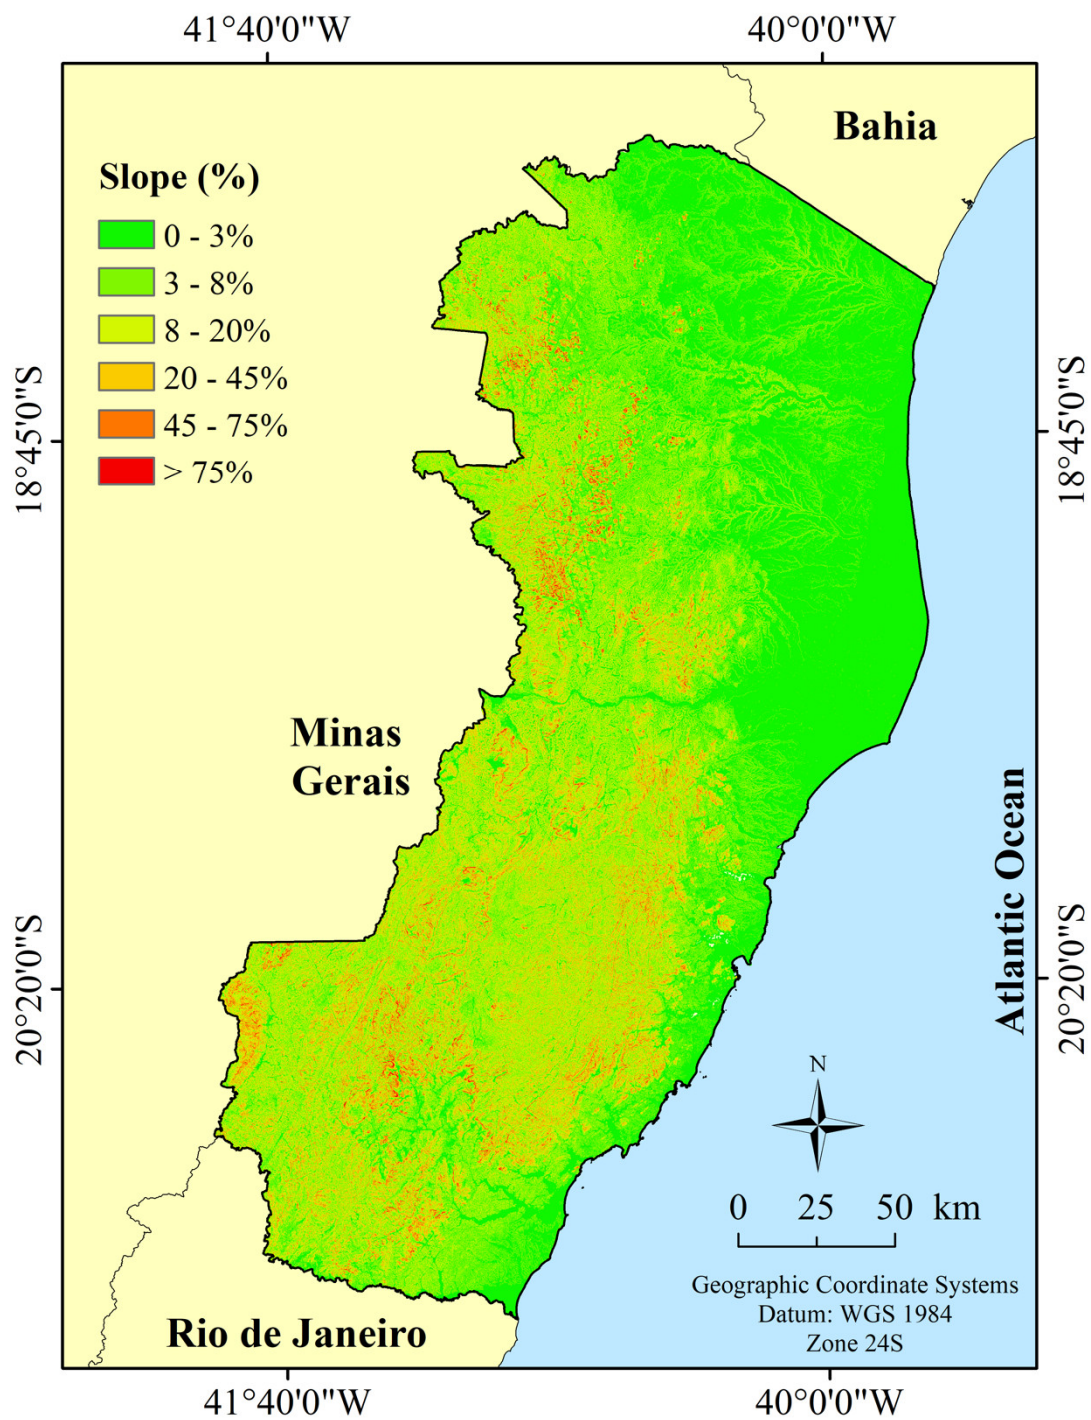

Figure S3. Slope classes for Espirito Santo state, Brazil, as proposed by EMBRAPA, (1979).

EMBRAPA, E.B. de P.A., 1979. Sumula da X reunião técnica de levantamento de solos. Serviço Nac. Levant. E Conserv. Solos 10, 83.



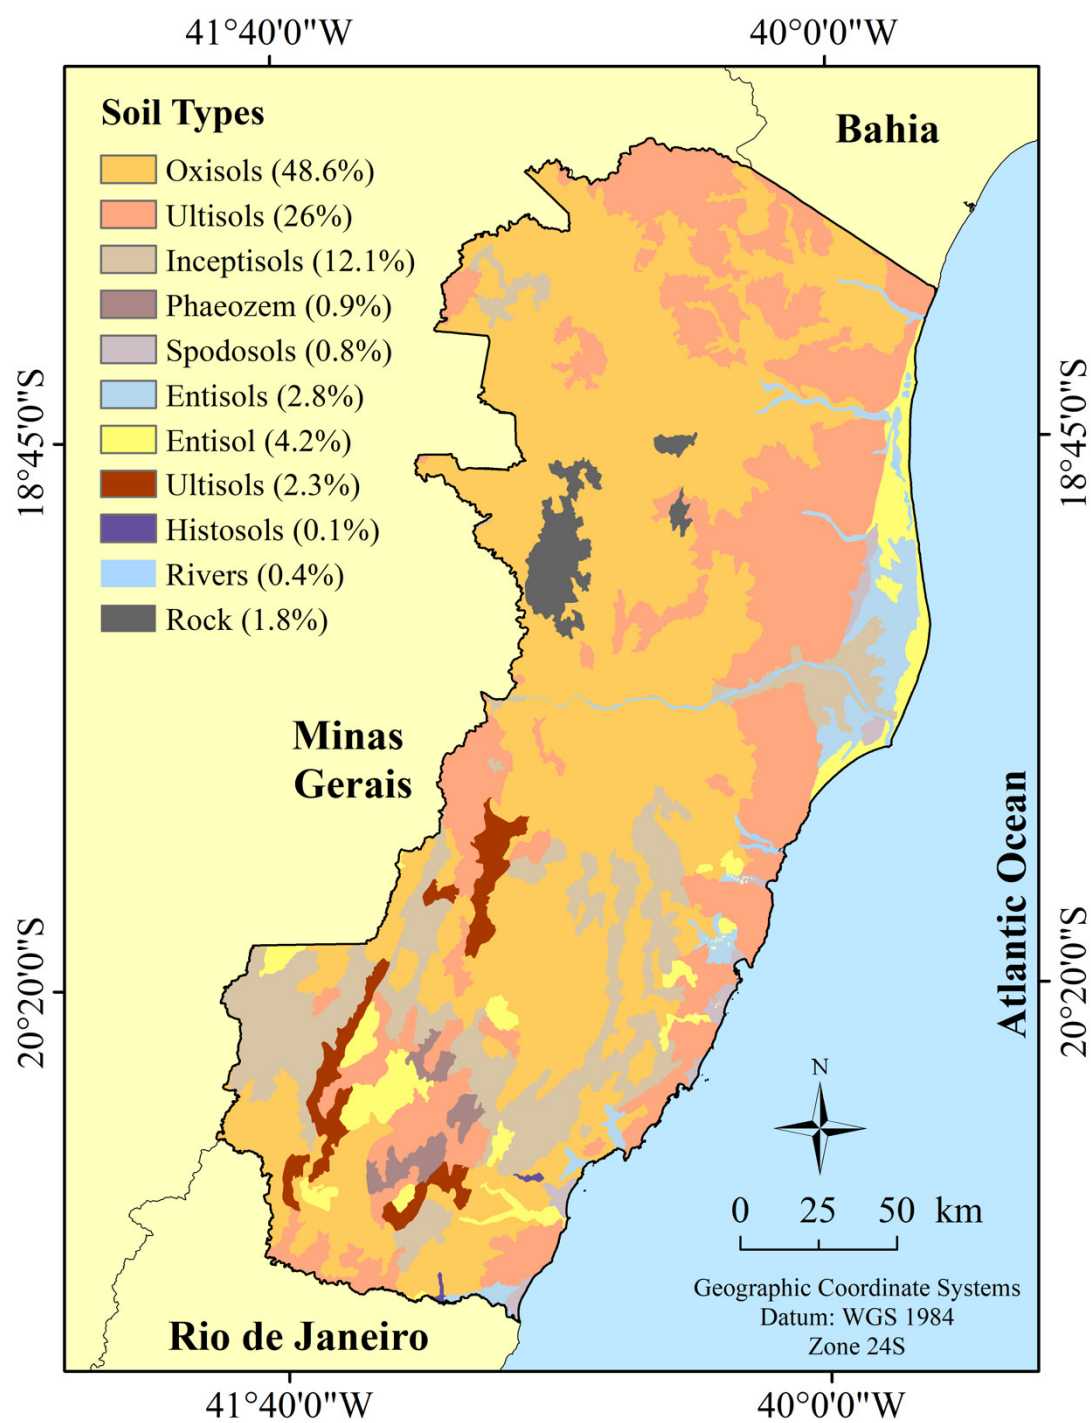

Figure S4. Soil types for Espírito Santo state, Brasil.

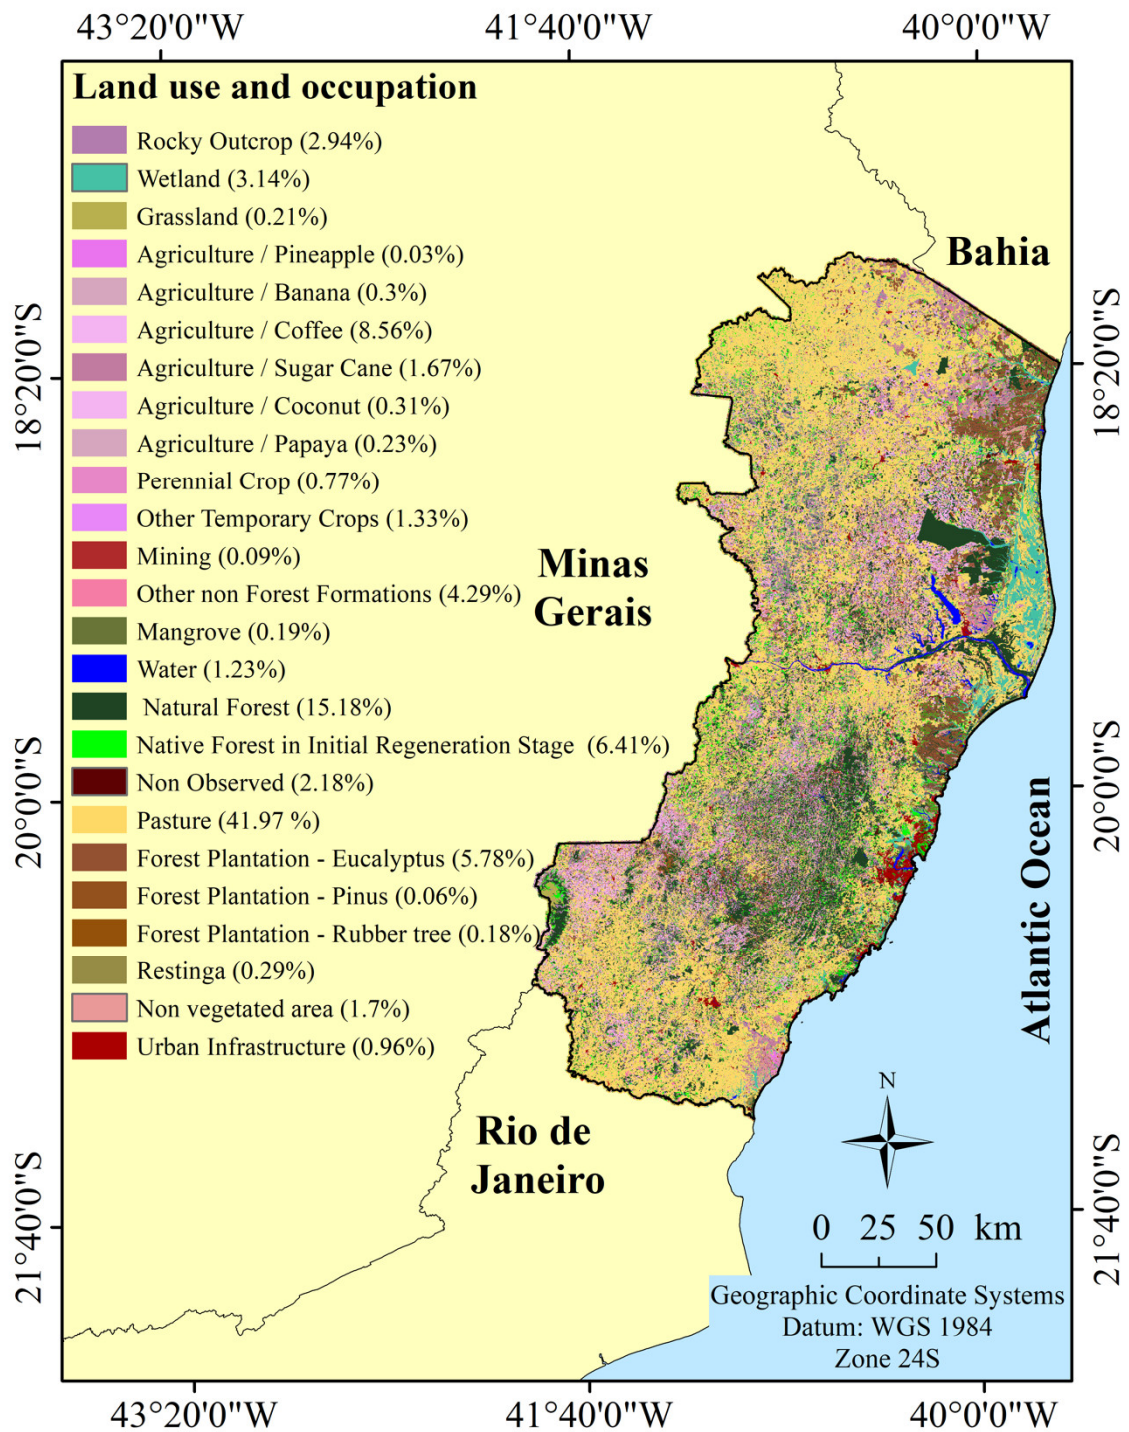

Figure S5. Land use and occupation for Espírito Santo state, Brazil.

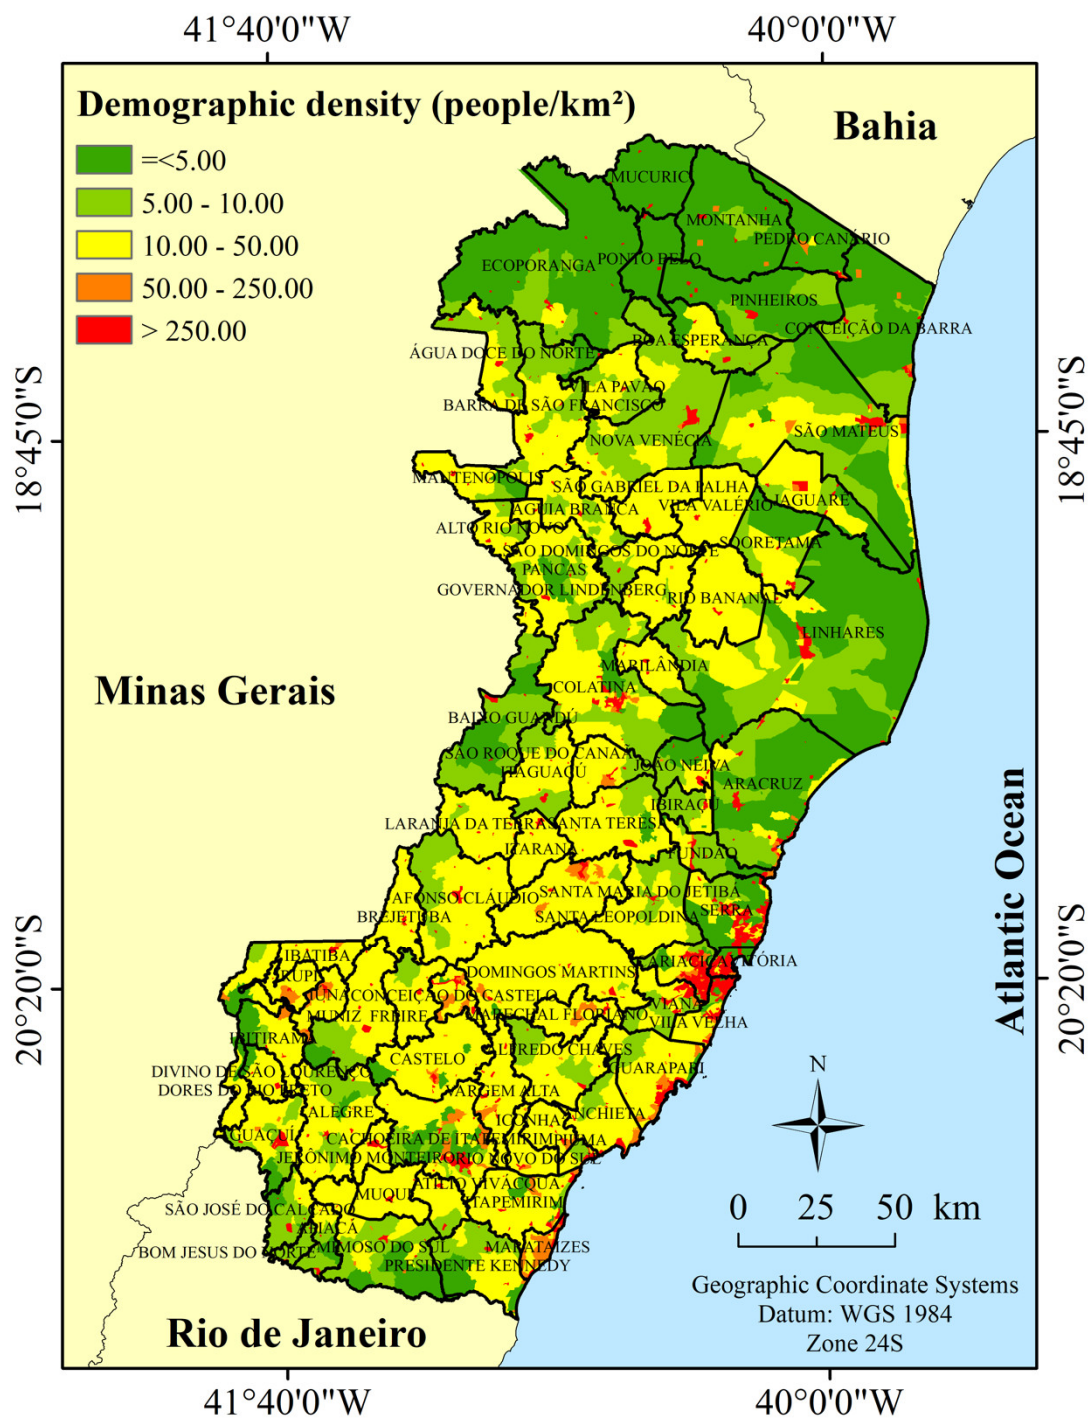

Figure S6. Demographic density (people/km<sup>2</sup>) and municipalities identification for Espírito Santo state, Brazil.

Table S1. Flood vulnerability area, in square kilometers, by municipality for Espírito Santo state, Brazil.

| Municipalities     |        | Very Low | Low    | Medium | High   | Very High |
|--------------------|--------|----------|--------|--------|--------|-----------|
| Água Doce do Norte | Annual | 46.81    | 345.34 | 72.97  | 10.36  | 0.02      |
|                    | Dry    | 223.63   | 226.45 | 20.45  | 4.98   |           |
|                    | Rainy  |          | 120.26 | 329.20 | 24.40  | 1.64      |
| Águia Branca       | Annual | 100.34   | 191.03 | 149.22 | 11.78  | 0.12      |
|                    | Dry    | 140.33   | 241.26 | 63.50  | 7.39   | 0.01      |
|                    | Rainy  | 75.72    | 159.88 | 190.64 | 24.43  | 1.84      |
| Afonso Cláudio     | Annual | 198.81   | 664.70 | 79.90  | 10.40  | 0.66      |
|                    | Dry    | 425.38   | 503.39 | 23.32  | 2.37   |           |
|                    | Rainy  | 256.18   | 637.34 | 55.17  | 5.51   | 0.27      |
| Alegre             | Annual |          |        | 69.83  | 660.07 | 43.50     |
|                    | Dry    |          | 117.35 | 626.66 | 28.34  | 1.04      |
|                    | Rainy  |          |        |        | 88.05  | 685.34    |
| Alfredo Chaves     | Annual |          |        | 39.09  | 276.10 | 301.38    |
|                    | Dry    | 0.16     | 11.37  | 40.27  | 155.24 | 409.52    |
|                    | Rainy  |          | 2.46   | 43.79  | 253.82 | 316.49    |
| Alto Rio Novo      | Annual | 7.93     | 202.19 | 14.77  | 1.69   | 0.05      |
|                    | Dry    | 42.81    | 178.85 | 4.00   | 0.96   |           |
|                    | Rainy  | 1.75     | 115.95 | 105.85 | 2.84   | 0.24      |
| Anchieta           | Annual |          |        |        | 62.63  | 342.46    |
|                    | Dry    |          |        |        | 1.47   | 403.62    |
|                    | Rainy  |          |        |        | 45.28  | 359.81    |
| Apiacá             | Annual |          |        | 20.21  | 168.34 | 5.09      |
|                    | Dry    |          | 9.93   | 118.16 | 65.23  | 0.32      |
|                    | Rainy  |          |        | 2.09   | 124.23 | 67.32     |
| Aracruz            | Annual | 0.00     | 100.25 | 603.00 | 581.72 | 147.19    |
|                    | Dry    | 0.00     | 92.17  | 614.56 | 594.43 | 131.01    |
|                    | Rainy  | 0.18     | 80.91  | 575.06 | 583.92 | 192.10    |
| Atilio Vivácqua    | Annual |          | 0.01   | 72.05  | 148.31 | 6.49      |
|                    | Dry    |          | 0.53   | 53.94  | 166.71 | 5.68      |
|                    | Rainy  |          | 9.54   | 133.76 | 77.69  | 5.86      |

|                                |        |         |        |        |        |        |
|--------------------------------|--------|---------|--------|--------|--------|--------|
| <b>Baixo Guandu</b>            | Annual | 89.99   | 557.94 | 251.30 | 13.05  | 0.24   |
|                                | Dry    | 186.48  | 623.82 | 92.75  | 9.48   | 0.01   |
|                                | Rainy  | 110.29  | 633.50 | 156.99 | 11.56  | 0.17   |
| <b>Barra de São Francisco</b>  | Annual | 46.68   | 440.99 | 429.65 | 19.17  | 0.39   |
|                                | Dry    | 213.45  | 649.77 | 66.05  | 7.61   | 0.01   |
|                                | Rainy  |         | 161.95 | 712.92 | 58.21  | 3.82   |
| <b>Boa Esperança</b>           | Annual | 9.05    | 326.05 | 90.05  | 1.55   |        |
|                                | Dry    | 32.01   | 290.75 | 102.49 | 1.45   |        |
|                                | Rainy  | 5.24    | 260.58 | 156.89 | 3.99   | 0.00   |
| <b>Bom Jesus do Norte</b>      | Annual |         |        | 8.58   | 78.26  | 2.54   |
|                                | Dry    |         | 3.49   | 48.00  | 37.84  | 0.05   |
|                                | Rainy  |         |        | 0.20   | 37.52  | 51.67  |
| <b>Brejetuba</b>               | Annual | 22.04   | 249.31 | 65.49  | 3.51   | 0.21   |
|                                | Dry    | 225.84  | 109.87 | 4.63   | 0.24   |        |
|                                | Rainy  | 30.22   | 273.64 | 34.11  | 2.50   | 0.09   |
| <b>Cachoeiro de Itapemirim</b> | Annual |         |        | 116.83 | 689.41 | 71.06  |
|                                | Dry    |         | 55.16  | 329.01 | 467.26 | 25.88  |
|                                | Rainy  |         | 1.21   | 93.85  | 525.85 | 256.40 |
| <b>Cariacica</b>               | Annual |         |        | 4.78   | 116.24 | 154.72 |
|                                | Dry    |         |        |        | 69.72  | 206.02 |
|                                | Rainy  |         |        | 15.02  | 115.19 | 145.54 |
| <b>Castelo</b>                 | Annual |         | 13.83  | 273.95 | 335.96 | 45.24  |
|                                | Dry    | 153.01  | 317.03 | 172.79 | 25.93  | 0.21   |
|                                | Rainy  |         | 52.07  | 295.21 | 271.78 | 49.92  |
| <b>Colatina</b>                | Annual | 1081.81 | 325.66 | 17.35  | 1.21   | 0.00   |
|                                | Dry    | 932.50  | 446.76 | 45.22  | 1.54   | 0.00   |
|                                | Rainy  | 1121.61 | 284.38 | 18.98  | 1.06   | 0.00   |
| <b>Conceição da Barra</b>      | Annual |         | 150.94 | 762.76 | 245.82 | 18.87  |
|                                | Dry    |         | 13.39  | 570.43 | 535.70 | 58.86  |
|                                | Rainy  | 11.89   | 817.83 | 295.95 | 52.72  |        |
| <b>Conceição do Castelo</b>    | Annual |         | 65.96  | 254.86 | 35.44  | 8.57   |
|                                | Dry    | 301.12  | 51.52  | 11.54  | 0.64   |        |
|                                | Rainy  | 0.00    | 134.68 | 203.17 | 23.57  | 3.40   |
| <b>Divino São Lourenço</b>     | Annual |         |        | 47.03  | 125.70 | 3.08   |
|                                | Dry    |         | 58.04  | 114.79 | 2.96   | 0.01   |
|                                | Rainy  |         |        | 26.25  | 58.30  | 91.25  |
| <b>Domingos Martins</b>        | Annual | 1.32    | 168.36 | 521.33 | 491.34 | 43.92  |
|                                | Dry    | 202.47  | 284.89 | 276.09 | 362.13 | 100.68 |



|                              |        |        |         |         |        |        |
|------------------------------|--------|--------|---------|---------|--------|--------|
|                              | Rainy  | 6.37   | 256.93  | 589.01  | 348.71 | 25.25  |
| <b>Dores do Rio Preto</b>    | Annual |        | 0.43    | 44.62   | 102.38 | 3.25   |
|                              | Dry    | 3.52   | 44.80   | 98.79   | 3.53   | 0.04   |
|                              | Rainy  |        |         | 14.58   | 85.28  | 50.83  |
| <b>Ecoporanga</b>            | Annual | 222.05 | 2007.33 | 41.00   | 5.24   | 0.00   |
|                              | Dry    | 628.12 | 1618.70 | 27.52   | 1.29   |        |
|                              | Rainy  |        | 270.55  | 1955.21 | 45.43  | 4.43   |
| <b>Fundão</b>                | Annual |        |         | 2.30    | 135.01 | 138.65 |
|                              | Dry    |        |         | 0.01    | 136.27 | 139.69 |
|                              | Rainy  |        |         |         | 67.38  | 208.59 |
| <b>Governador Lindenberg</b> | Annual | 344.77 | 15.04   | 0.05    |        |        |
|                              | Dry    | 328.32 | 29.70   | 1.84    |        |        |
|                              | Rainy  | 341.57 | 18.19   | 0.11    |        |        |
| <b>Guaçuí</b>                | Annual |        |         | 65.12   | 393.39 | 9.77   |
|                              | Dry    |        | 99.95   | 363.03  | 5.11   | 0.18   |
|                              | Rainy  |        |         |         | 125.99 | 342.28 |
| <b>Guarapari</b>             | Annual |        |         | 10.37   | 316.50 | 266.90 |
|                              | Dry    |        |         |         | 28.31  | 565.46 |
|                              | Rainy  |        | 9.29    | 144.05  | 262.84 | 177.59 |
| <b>Iúna</b>                  | Annual |        | 75.65   | 321.01  | 58.49  | 3.72   |
|                              | Dry    | 88.44  | 315.50  | 49.56   | 5.36   | 0.00   |
|                              | Rainy  |        | 13.66   | 231.22  | 205.33 | 8.66   |
| <b>Ibatiba</b>               | Annual |        | 30.04   | 194.08  | 13.07  | 2.40   |
|                              | Dry    | 72.27  | 157.37  | 8.24    | 1.72   |        |
|                              | Rainy  |        | 41.82   | 173.83  | 21.69  | 2.26   |
| <b>Ibiraçu</b>               | Annual |        |         | 17.09   | 154.01 | 29.25  |
|                              | Dry    |        |         | 25.87   | 155.12 | 19.36  |
|                              | Rainy  |        |         | 9.87    | 121.05 | 69.42  |
| <b>Ibitirama</b>             | Annual |        | 19.40   | 129.02  | 173.61 | 7.96   |
|                              | Dry    | 59.83  | 87.04   | 178.32  | 4.78   | 0.02   |
|                              | Rainy  |        | 0.62    | 88.27   | 161.20 | 79.90  |
| <b>Iconha</b>                | Annual |        |         |         | 35.38  | 167.23 |
|                              | Dry    |        |         |         | 18.47  | 184.14 |
|                              | Rainy  |        |         |         | 39.20  | 163.41 |
| <b>Irupi</b>                 | Annual |        | 11.95   | 158.07  | 13.48  | 0.80   |

|                          |        |        |         |         |        |        |
|--------------------------|--------|--------|---------|---------|--------|--------|
|                          | Dry    | 21.22  | 155.07  | 7.25    | 0.74   |        |
|                          | Rainy  |        | 3.43    | 114.44  | 64.87  | 1.56   |
|                          | Annual | 11.78  | 278.07  | 228.66  | 11.49  | 0.97   |
| <b>Itaguaçu</b>          | Dry    | 51.99  | 295.30  | 175.84  | 7.37   | 0.46   |
|                          | Rainy  | 14.11  | 261.90  | 240.84  | 12.96  | 1.15   |
|                          | Annual |        | 0.01    | 83.95   | 432.34 | 41.62  |
| <b>Itapemirim</b>        | Dry    |        |         | 32.49   | 433.85 | 91.58  |
|                          | Rainy  |        | 18.33   | 310.56  | 215.68 | 13.35  |
|                          | Annual | 3.28   | 87.91   | 154.87  | 51.02  | 2.09   |
| <b>Itarana</b>           | Dry    | 22.87  | 112.93  | 136.01  | 26.28  | 1.09   |
|                          | Rainy  | 7.54   | 83.14   | 147.49  | 58.48  | 2.54   |
|                          | Annual | 1.97   | 142.92  | 411.65  | 98.51  | 1.32   |
| <b>Jaguaré</b>           | Dry    | 2.63   | 96.50   | 391.40  | 163.58 | 2.26   |
|                          | Rainy  | 5.69   | 320.83  | 264.65  | 65.21  |        |
|                          | Annual |        |         | 9.87    | 141.58 | 10.85  |
| <b>Jerônimo Monteiro</b> | Dry    |        | 9.56    | 115.29  | 35.95  | 1.51   |
|                          | Rainy  |        |         |         | 11.23  | 151.07 |
|                          | Annual | 2.89   | 96.70   | 114.36  | 55.18  | 3.81   |
| <b>João Neiva</b>        | Dry    | 0.99   | 76.72   | 135.14  | 57.37  | 2.73   |
|                          | Rainy  | 4.23   | 93.11   | 107.09  | 63.61  | 4.90   |
|                          | Annual | 37.99  | 360.26  | 57.54   | 0.35   |        |
| <b>Laranja da Terra</b>  | Dry    | 137.36 | 305.09  | 13.61   | 0.07   |        |
|                          | Rainy  | 56.59  | 350.62  | 48.56   | 0.36   |        |
|                          | Annual | 348.50 | 784.07  | 1469.53 | 803.76 | 92.94  |
| <b>Linhares</b>          | Dry    | 354.65 | 1060.67 | 1371.94 | 707.94 | 3.58   |
|                          | Rainy  | 352.16 | 679.29  | 1316.03 | 955.09 | 196.23 |
|                          | Annual | 13.71  | 197.66  | 102.94  | 1.82   | 0.04   |
| <b>Mantenópolis</b>      | Dry    | 67.63  | 244.80  | 3.30    | 0.42   |        |
|                          | Rainy  |        | 62.37   | 250.24  | 3.29   | 0.26   |
|                          | Annual |        |         | 7.66    | 113.62 | 10.62  |
| <b>Marataízes</b>        | Dry    |        |         | 2.28    | 97.16  | 32.46  |
|                          | Rainy  |        | 1.40    | 42.18   | 87.40  | 0.92   |
|                          | Annual |        |         | 18.37   | 221.09 | 44.76  |
| <b>Marechal Floriano</b> | Dry    |        |         | 21.82   | 192.64 | 69.76  |
|                          | Rainy  |        | 0.00    | 66.85   | 191.54 | 25.83  |
|                          | Annual | 297.30 | 7.80    | 0.78    |        |        |
| <b>Marilândia</b>        | Dry    | 284.91 | 16.09   | 4.88    |        |        |
|                          | Rainy  | 296.51 | 8.53    | 0.83    |        |        |
|                          | Annual |        | 0.12    | 214.26  | 637.65 | 16.12  |
| <b>Mimoso do Sul</b>     | Dry    |        | 28.97   | 403.13  | 425.06 | 10.98  |
|                          | Rainy  |        | 15.69   | 269.59  | 488.09 | 94.77  |
|                          | Annual | 1.77   | 182.50  | 838.94  | 73.33  |        |
| <b>Montanha</b>          | Dry    | 1.16   | 175.55  | 795.57  | 124.08 | 0.17   |

|                              |        |        |         |        |        |        |
|------------------------------|--------|--------|---------|--------|--------|--------|
|                              | Rainy  | 0.20   | 115.99  | 943.61 | 36.73  |        |
|                              | Annual | 2.52   | 143.73  | 366.62 | 22.04  |        |
| <b>Mucurici</b>              | Dry    | 3.35   | 160.86  | 339.14 | 31.55  | 0.01   |
|                              | Rainy  |        | 24.54   | 470.24 | 40.14  |        |
|                              | Annual |        | 48.70   | 343.68 | 266.88 | 20.52  |
| <b>Muniz Freire</b>          | Dry    | 168.55 | 332.69  | 169.61 | 8.82   | 0.12   |
|                              | Rainy  | 0.01   | 66.48   | 299.86 | 218.97 | 94.45  |
|                              | Annual |        | 0.13    | 65.69  | 244.68 | 16.97  |
| <b>Muqui</b>                 | Dry    |        | 18.68   | 232.25 | 70.98  | 5.56   |
|                              | Rainy  |        | 3.09    | 31.02  | 171.57 | 121.79 |
|                              | Annual | 114.30 | 1187.99 | 128.82 | 16.56  | 0.02   |
| <b>Nova Venécia</b>          | Dry    | 304.77 | 1079.86 | 55.34  | 7.72   |        |
|                              | Rainy  | 125.63 | 1036.53 | 261.70 | 23.63  | 0.21   |
|                              | Annual | 376.59 | 367.23  | 67.48  | 9.81   | 0.09   |
| <b>Pancas</b>                | Dry    | 448.20 | 319.12  | 50.24  | 3.64   |        |
|                              | Rainy  | 350.48 | 329.82  | 125.67 | 14.05  | 1.19   |
|                              | Annual |        | 90.56   | 286.81 | 51.83  | 0.04   |
| <b>Pedro Canário</b>         | Dry    |        | 42.55   | 299.01 | 87.45  | 0.22   |
|                              | Rainy  | 1.68   | 168.87  | 245.93 | 12.75  |        |
|                              | Annual |        |         |        | 4.94   | 68.97  |
| <b>Piúma</b>                 | Dry    |        |         |        | 2.68   | 71.23  |
|                              | Rainy  |        |         | 0.00   | 12.78  | 61.13  |
|                              | Annual | 6.67   | 430.08  | 500.70 | 39.40  | 0.01   |
| <b>Pinheiros</b>             | Dry    | 7.18   | 314.81  | 521.89 | 132.74 | 0.24   |
|                              | Rainy  | 6.57   | 381.20  | 565.01 | 24.08  | 0.01   |
|                              | Annual | 9.74   | 327.49  | 18.64  | 0.85   |        |
| <b>Ponto Belo</b>            | Dry    | 23.49  | 312.03  | 20.59  | 0.60   |        |
|                              | Rainy  |        | 14.27   | 322.90 | 19.01  | 0.55   |
|                              | Annual |        | 2.98    | 97.97  | 460.53 | 24.24  |
| <b>Presidente Kennedy</b>    | Dry    |        | 0.02    | 53.27  | 502.37 | 30.07  |
|                              | Rainy  |        | 48.11   | 478.44 | 57.78  | 1.39   |
|                              | Annual | 204.27 | 294.88  | 126.86 | 15.87  | 2.25   |
| <b>Rio Bananal</b>           | Dry    | 165.31 | 342.90  | 121.77 | 14.16  |        |
|                              | Rainy  | 217.58 | 278.33  | 121.56 | 24.24  | 2.43   |
|                              | Annual |        |         | 2.23   | 105.50 | 96.05  |
| <b>Rio Novo do Sul</b>       | Dry    |        |         | 0.08   | 86.73  | 116.97 |
|                              | Rainy  |        |         | 8.19   | 151.40 | 44.19  |
|                              | Annual | 278.31 | 21.06   | 0.43   |        |        |
| <b>São Domingos do Norte</b> | Dry    | 266.55 | 32.38   | 0.86   | 0.00   |        |
|                              | Rainy  | 256.46 | 43.05   | 0.28   |        |        |
|                              | Annual | 111.12 | 316.43  | 6.73   | 0.55   |        |
| <b>São Gabriel da Palha</b>  | Dry    | 161.43 | 270.21  | 3.10   | 0.10   |        |
|                              | Rainy  | 116.73 | 312.21  | 5.43   | 0.46   |        |

|                                |        |        |         |         |        |        |
|--------------------------------|--------|--------|---------|---------|--------|--------|
| <b>São José do Calçado</b>     | Annual |        |         | 34.04   | 229.99 | 8.45   |
|                                | Dry    |        |         | 21.92   | 200.78 | 49.05  |
|                                | Rainy  |        |         | 0.02    | 73.67  | 198.78 |
| <b>São Mateus</b>              | Annual | 51.00  | 707.34  | 1226.40 | 341.24 | 15.63  |
|                                | Dry    | 81.17  | 525.59  | 724.82  | 924.42 | 85.61  |
|                                | Rainy  | 106.57 | 1576.53 | 548.39  | 110.12 |        |
| <b>São Roque do Canaã</b>      | Annual | 7.67   | 124.40  | 169.86  | 38.65  | 1.81   |
|                                | Dry    | 6.21   | 106.53  | 206.01  | 22.99  | 0.64   |
|                                | Rainy  | 9.98   | 105.31  | 178.95  | 46.06  | 2.09   |
| <b>Santa Leopoldina</b>        | Annual |        |         | 10.92   | 370.78 | 333.98 |
|                                | Dry    |        |         | 5.05    | 444.51 | 266.12 |
|                                | Rainy  |        |         | 1.02    | 304.16 | 410.50 |
| <b>Santa Maria de Jetibá</b>   | Annual | 21.94  | 166.74  | 162.82  | 267.66 | 116.82 |
|                                | Dry    | 83.52  | 154.14  | 150.13  | 281.44 | 66.73  |
|                                | Rainy  | 40.43  | 155.51  | 144.94  | 224.65 | 170.45 |
| <b>Santa Teresa</b>            | Annual |        | 1.75    | 98.84   | 499.08 | 94.30  |
|                                | Dry    |        | 0.62    | 143.58  | 507.19 | 42.59  |
|                                | Rainy  |        | 0.91    | 54.63   | 439.32 | 199.11 |
| <b>Serra</b>                   | Annual |        |         |         | 105.22 | 444.74 |
|                                | Dry    |        |         |         | 66.11  | 483.85 |
|                                | Rainy  |        |         |         | 34.99  | 514.97 |
| <b>Sooretama</b>               | Annual | 3.24   | 301.78  | 257.19  | 30.25  | 0.23   |
|                                | Dry    | 0.85   | 289.03  | 277.82  | 24.98  |        |
|                                | Rainy  | 0.30   | 294.28  | 249.37  | 48.68  | 0.06   |
| <b>Vargem Alta</b>             | Annual |        |         | 82.26   | 270.85 | 61.70  |
|                                | Dry    | 8.04   | 40.12   | 94.72   | 236.76 | 35.17  |
|                                | Rainy  |        | 9.11    | 105.00  | 268.80 | 31.91  |
| <b>Venda Nova do Imigrante</b> | Annual |        | 32.88   | 130.14  | 24.04  | 1.33   |
|                                | Dry    | 159.74 | 26.73   | 1.91    | 0.01   |        |
|                                | Rainy  |        | 74.88   | 104.37  | 8.74   | 0.40   |
| <b>Viana</b>                   | Annual |        |         | 12.49   | 253.63 | 46.07  |
|                                | Dry    |        |         |         | 38.82  | 273.37 |
|                                | Rainy  |        | 4.04    | 153.49  | 144.71 | 9.95   |
| <b>Vila Pavão</b>              | Annual | 48.18  | 358.99  | 21.03   | 4.14   | 0.00   |



|                     |        |        |        |        |        |        |
|---------------------|--------|--------|--------|--------|--------|--------|
| <b>Vila Valério</b> | Dry    | 120.47 | 301.01 | 10.46  | 0.40   |        |
|                     | Rainy  | 13.85  | 282.18 | 129.22 | 7.02   | 0.07   |
|                     | Annual | 53.02  | 384.53 | 24.68  | 0.41   |        |
|                     | Dry    | 76.09  | 310.81 | 75.36  | 0.39   |        |
|                     | Rainy  | 75.15  | 346.67 | 40.66  | 0.16   |        |
|                     | Annual |        |        | 2.67   | 130.37 | 77.43  |
| <b>Vila Velha</b>   | Dry    |        |        |        | 14.77  | 195.70 |
|                     | Rainy  |        | 21.53  | 98.97  | 46.43  | 43.53  |
|                     | Annual |        |        |        | 17.31  | 70.76  |
| <b>Vitória</b>      | Dry    |        |        |        | 8.19   | 79.87  |
|                     | Rainy  |        |        |        | 4.06   | 84.00  |

Source: the authors.
